# Supplementary material for: Quality of Life Following Receipt of Adjuvant Chemotherapy With and Without Bevacizumab in Patients With Lymph Node–Positive and High-Risk Lymph Node–Negative Breast Cancer
Source: PubMed Central journal article supplement (PMC8886546; doi:10.1001/jamanetworkopen.2022.0254), 2022-02-28
Supplement: jamanetwopen-e220254-s002.pdf [file jamanetwopen-e220254-s002.pdf]

## Supplemental Online Content

Rosenberg SM, O'Neill A, Sepucha K, et al. Quality of life following receipt of adjuvant chemotherapy with and without bevacizumab in patients with lymph node–positive and high-risk lymph node–negative breast cancer. *JAMA Netw Open*. 2022;5(2):e220254. doi:10.1001/jamanetworkopen.2022.0254

**eFigure.** E5103 Decision-making–Quality of Life Flowchart

**eTable.** Comparison of Baseline Characteristics Between Those Included and Not Included in the QOL Analysis Relative to the Parent Trial

This supplemental material has been provided by the authors to give readers additional information about their work.

eFigure. E5103 Decision-making–Quality of Life Flowchart

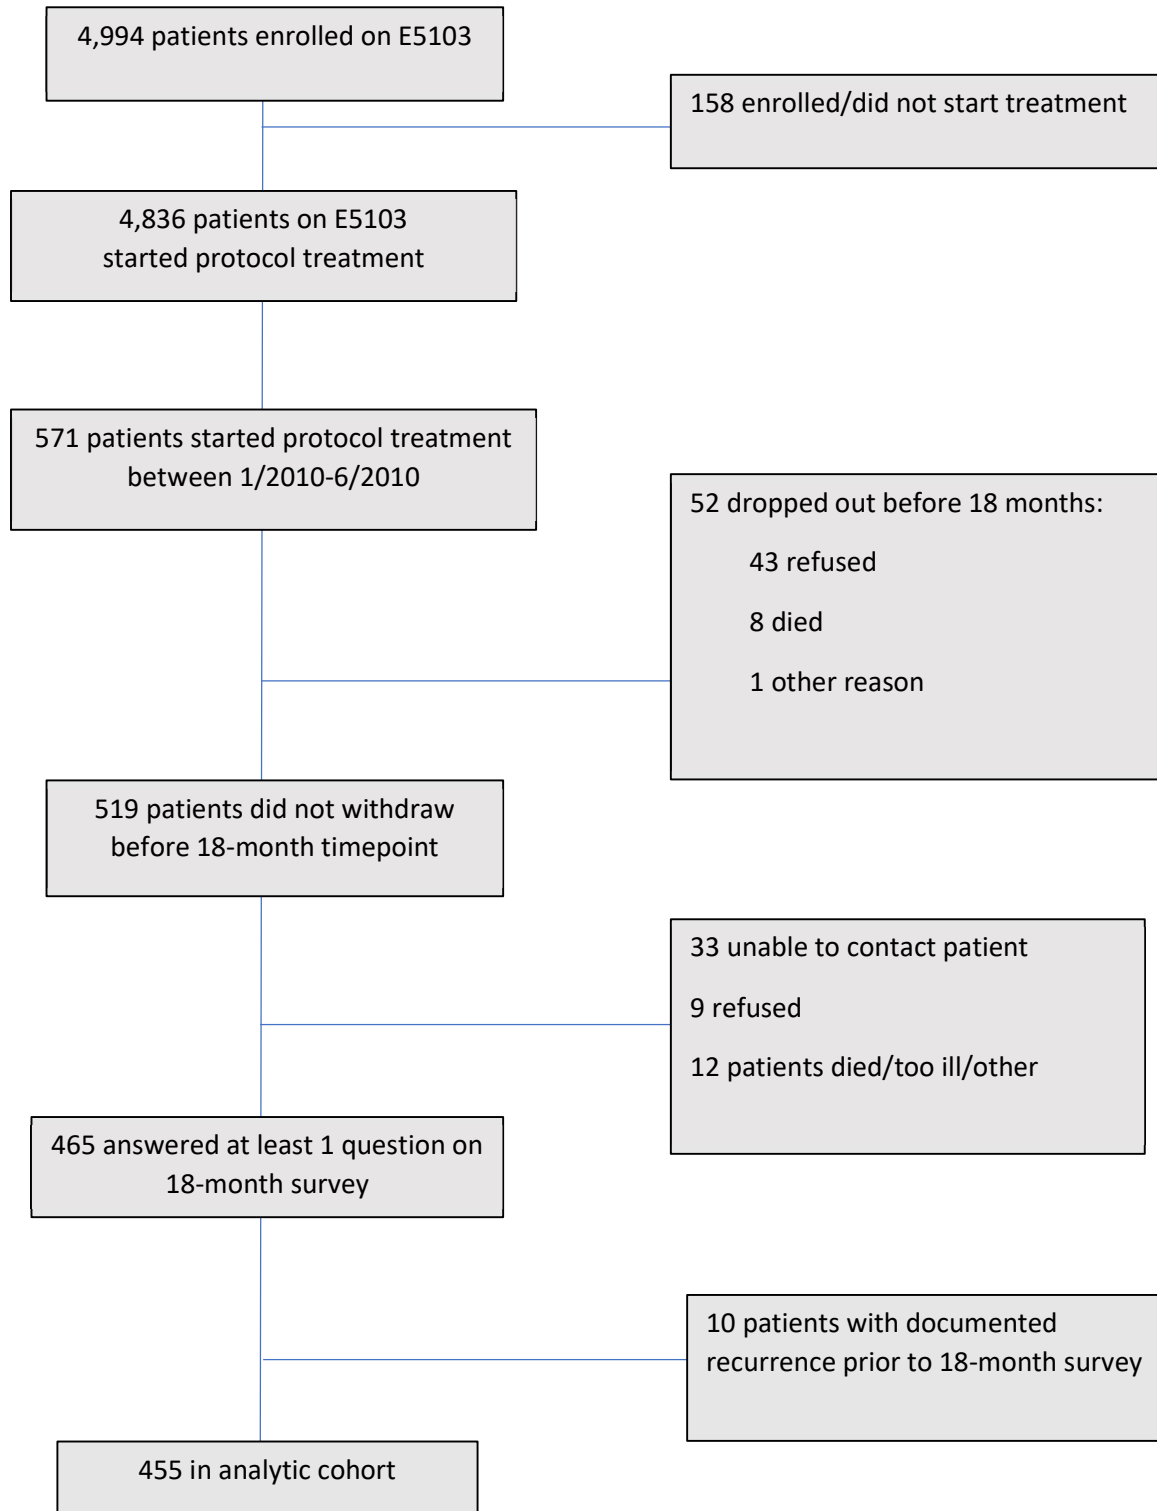

**eTable.** Comparison of Baseline Characteristics Between Those Included and Not Included in the QOL Analysis Relative to the Parent Trial

|                           | Parent Trial not in QOL<br>N=4381 | In QOL<br>N=455 | Total<br>N=4836* |
|---------------------------|-----------------------------------|-----------------|------------------|
|                           | n (%)                             | n (%)           | n (%)            |
| Gender                    |                                   |                 |                  |
| Male                      | 19(<1)                            | 3(<1)           | 22               |
| Female                    | 4362(99.6)                        | 452(99.3)       | 4814             |
| Age                       |                                   |                 |                  |
| Median                    | 51.6                              | 51.9            | 51.6             |
| Race                      |                                   |                 |                  |
| White                     | 3702(85)                          | 393(86)         | 4095             |
| Other                     | 679(15)                           | 62(14)          | 741              |
| Ethnicity                 |                                   |                 |                  |
| Hispanic                  | 318(8)                            | 23(5)           | 341              |
| Non-Hispanic              | 3867(92)                          | 403(95)         | 4270             |
| Missing/unknown           |                                   |                 | 225              |
| Primary Surgery/RT        |                                   |                 |                  |
| Breast Conserving Surgery | 1968(46)                          | 195(43)         | 2163             |
| Mastectomy no WBRT        | 870(20)                           | 86(19)          | 956              |
| Mastectomy +WBRT          | 1451(34)                          | 171(38)         | 1622             |
| Missing                   |                                   |                 | 95               |
| ERpGR Status              |                                   |                 |                  |
| ER and PgR Negative       | 1588(36)                          | 156(34)         | 1744             |
| ER and/or PgR Positive    | 2791(64)                          | 299(66)         | 3090             |
| Missing                   |                                   |                 | 2                |
| Tumor Size                |                                   |                 |                  |
| ≤2 cm                     | 1703(39)                          | 165(36)         | 1868             |
| >2                        | 2764(61)                          | 290(64)         | 2964             |
| Missing                   |                                   |                 | 4                |

|                         | Parent Trial not in QOL<br>N=4381 | In QOL<br>N=455 | Total<br>N=4836* |
|-------------------------|-----------------------------------|-----------------|------------------|
|                         | n (%)                             | n (%)           | n (%)            |
| <b>Nodal Status</b>     |                                   |                 |                  |
| Negative                | 1193(27)                          | 125(27)         | 1318             |
| Positive                | 3186(73)                          | 330(73)         | 3516             |
| Missing                 |                                   |                 | 2                |
| <b>Histologic Grade</b> |                                   |                 |                  |
| I                       | 375(9)                            | 39(9)           | 414              |
| II                      | 1412(33)                          | 160(36)         | 1572             |
| III                     | 2498(58)                          | 245(55)         | 2743             |
| Missing                 |                                   |                 | 107              |

\*n=4386 who started protocol treatment
