# Supplementary material for: Quality of Life Following Receipt of Adjuvant Chemotherapy With and Without Bevacizumab in Patients With Lymph Node–Positive and High-Risk Lymph Node–Negative Breast Cancer
Source: PubMed Central journal article supplement (PMC8886546; doi:10.1001/jamanetworkopen.2022.0254), 2022-02-28
Supplement: jamanetwopen-e220254-s003.pdf [file jamanetwopen-e220254-s003.pdf]

## Data Sharing Statement

Rosenberg. Quality of Life Following Receipt of Adjuvant Chemotherapy With and Without Bevacizumab in Patients With Lymph Node-Positive and High-Risk Lymph Node-Negative Breast Cancer. *JAMA Netw Open*. Published February 28, 2022.  
doi:10.1001/jamanetworkopen.2022.0254

### Data

**Data available:** Yes

**Data types:** Other (please specify)

**Additional Information:** All data to replicate the analyses in the article would be made available upon request.

**How to access data:** The data from the present article would be made available by request from the NCTN/NCORP Data Archive in a timeframe of at least 6 months after the request is made.

**When available:** With publication

### Supporting Documents

**Document types:** None

### Additional Information

**Who can access the data:** Anyone requesting the data via the NCTN/NCORP Data Archive (<https://nctn-data-archive.nci.nih.gov>).

**Types of analyses:** Investigators requesting the data outline a purpose through a data request mechanism

**Mechanisms of data availability:** The NCTN/NCORP Data Archive has an approval mechanism for the data request.
